# Supplementary material for: A Series of Asymmetrical Phthalocyanines: Synthesis and Near Infrared Properties
Source: Molecules. 2013 Apr 19;18(4):4628–39. doi: 10.3390/molecules18044628 (PMC6270185; doi:10.3390/molecules18044628)

## Supplementary Materials

**Scheme S1.** Synthesis of **Pn1-3**.

**Scheme S2.** The possible mechanism of formation of **1a**.

**Figure S1.**  $^1\text{H}$ -NMR of **Pn1-3**.

**Figure S2.** UV/VIS/NIR of **2a** and **3a**.

**Figure S3.**  $^1\text{H}$ - $^{13}\text{C}$ -NMR of **2a**.

**Figure S4.** Hi-Res MALDI of **2a** and MALDI TOF MS of **3a**.

**Figure S5.** IR of **1a-3a**.

**Figure S6.** UV-vis/NIR spectrum of **1b**.

**Figure S7.** The XRD of **2a-3a**.

**Scheme S1.** Synthesis of **Pn1-3**.

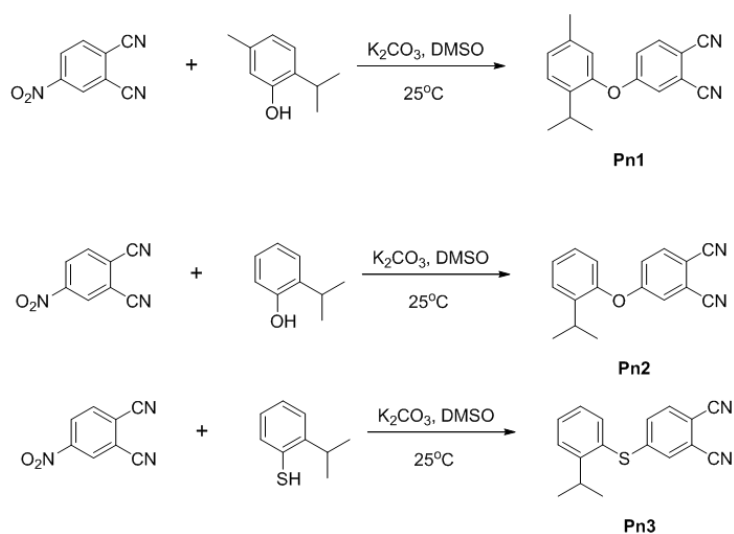

**Scheme S2.** The possible mechanism of formation of **1a**.

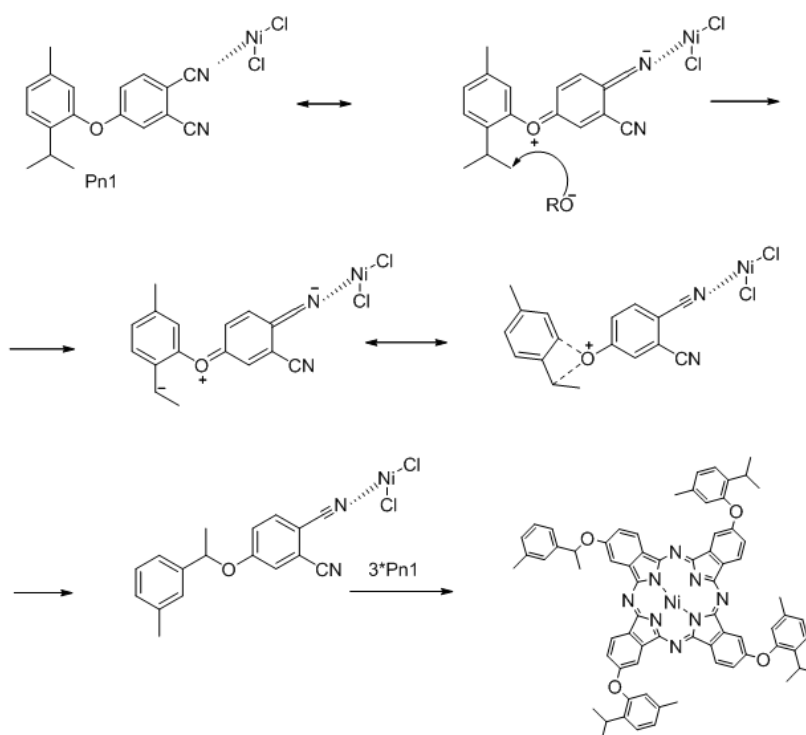

Figure S1.  $^1\text{H}$ -NMR of Pn1-3.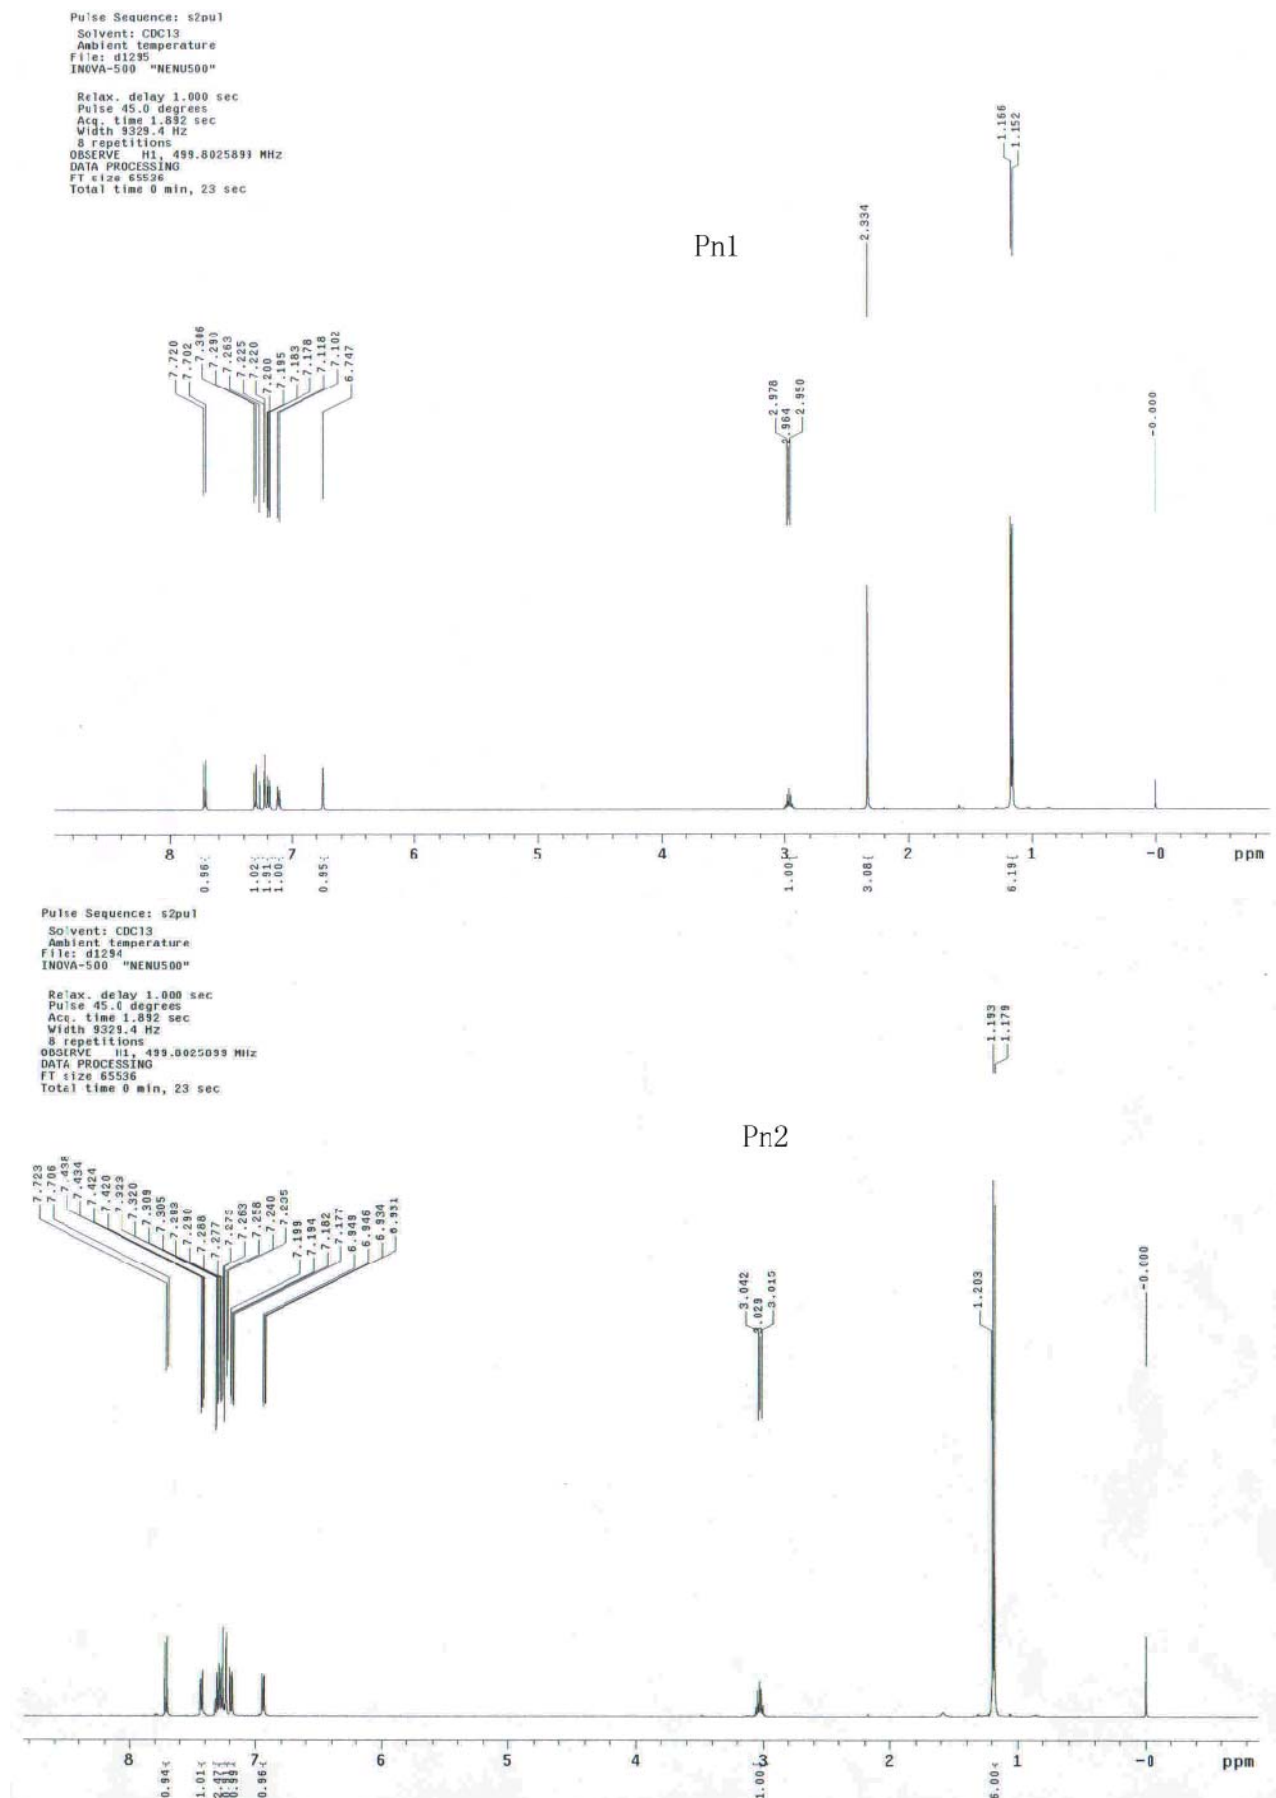

Figure S1. Cont.

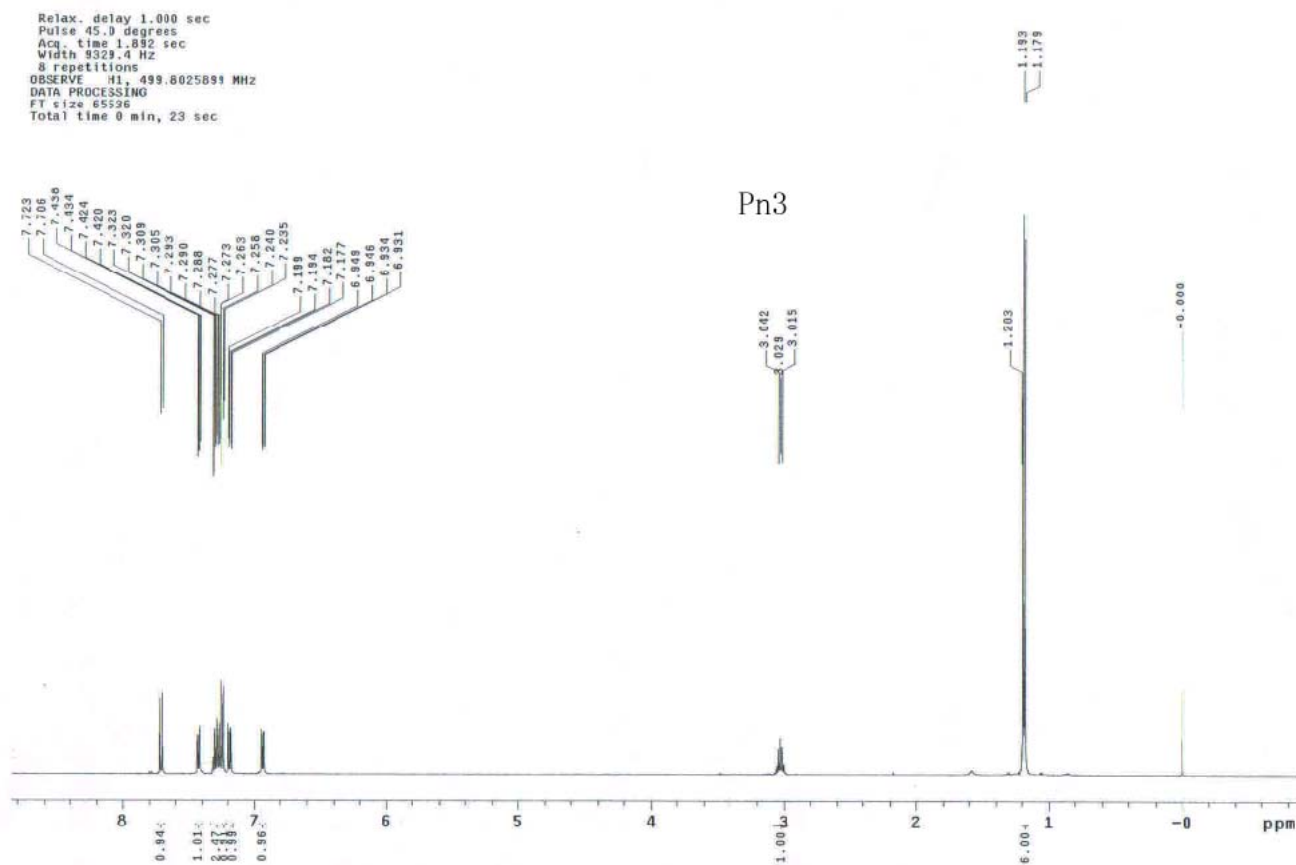

Figure S2. UV/VIS/NIR of 2a and 3a.

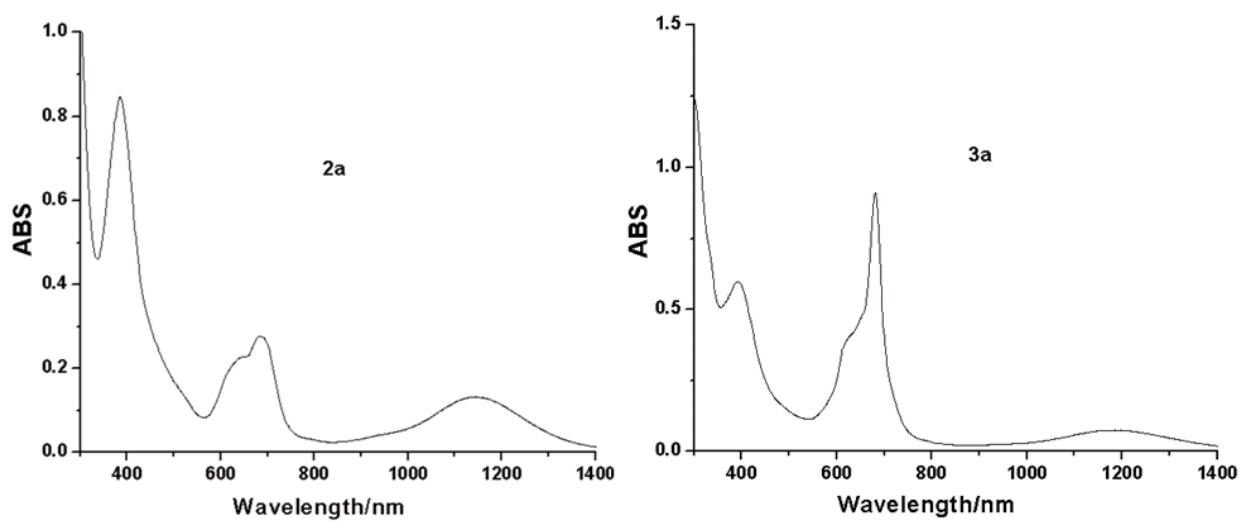

**Figure S3.**  $^1\text{H}$ - $^{13}\text{C}$ -NMR of **2a**.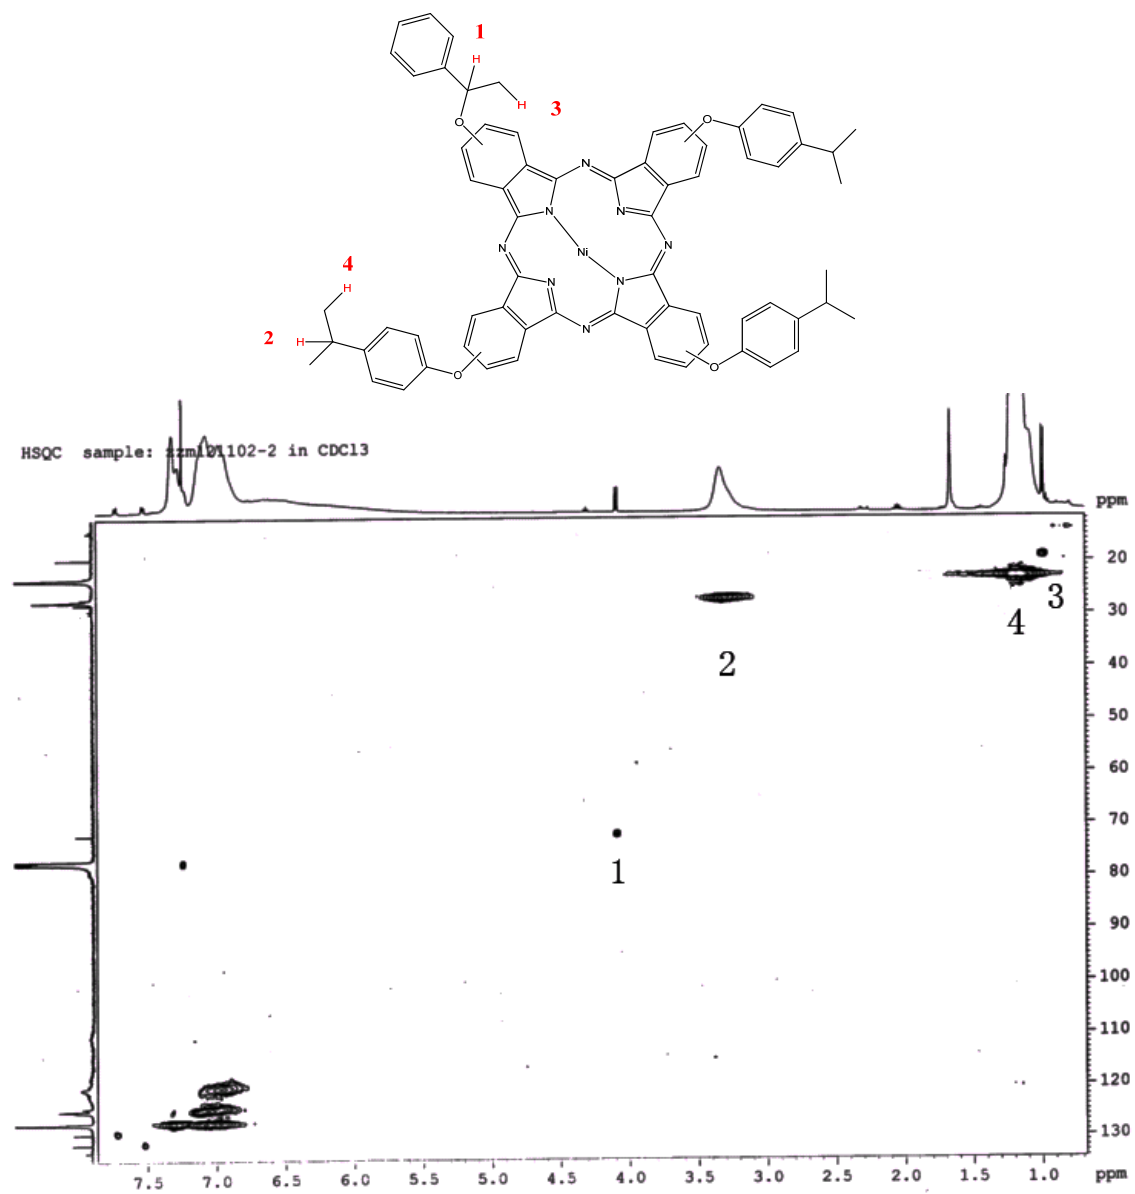

**Figure S4.** Hi-Res MALDI of **2a** and MALDI TOF MS of **3a**.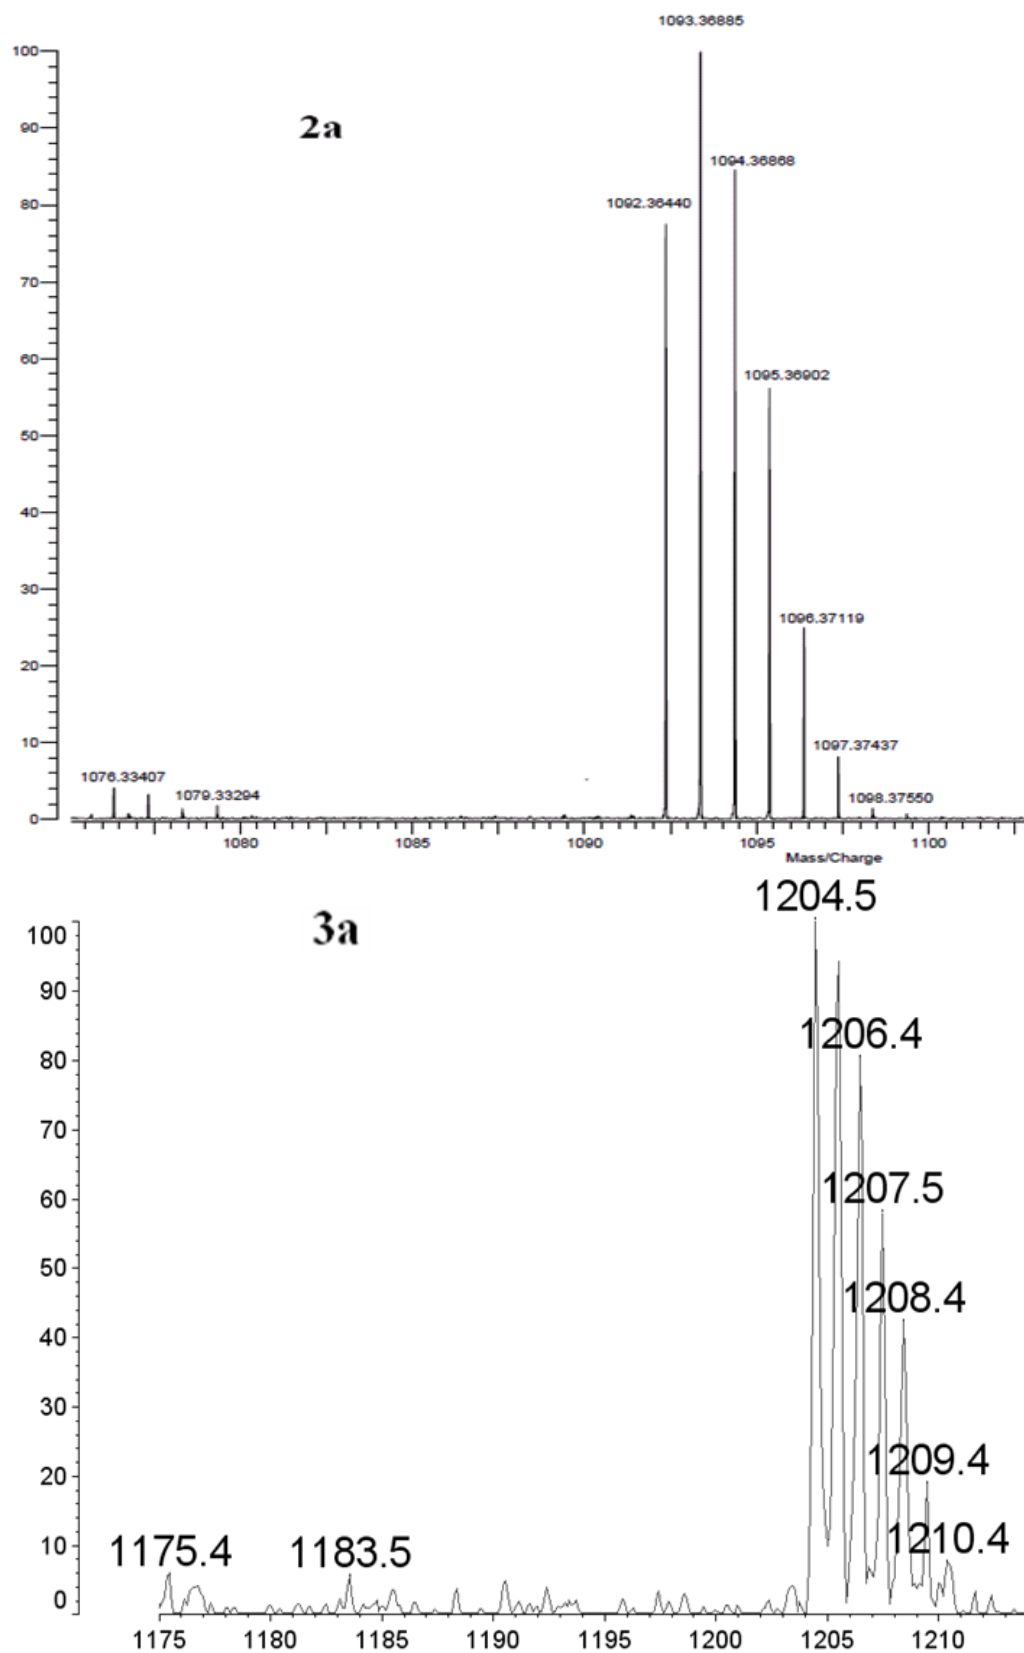

Figure S5. IR of 1a–3a.

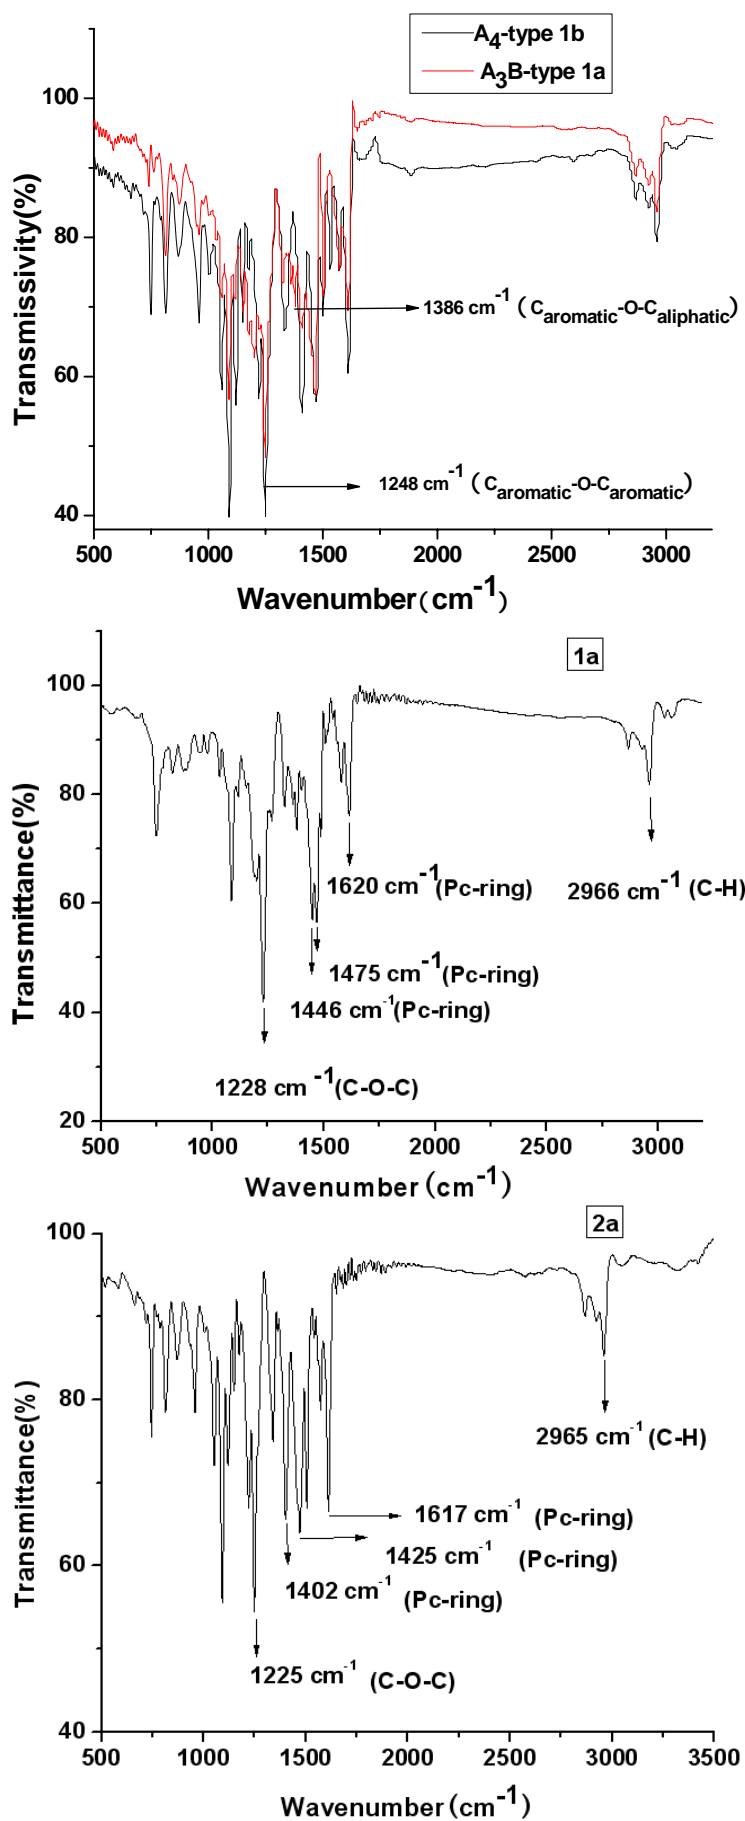

Figure S5. Cont.

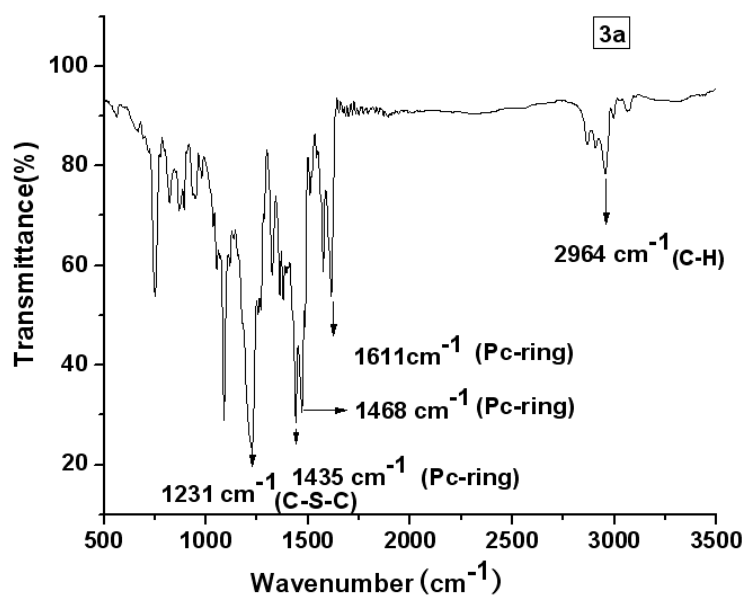Figure S6. UV-vis/NIR spectrum of **1b**.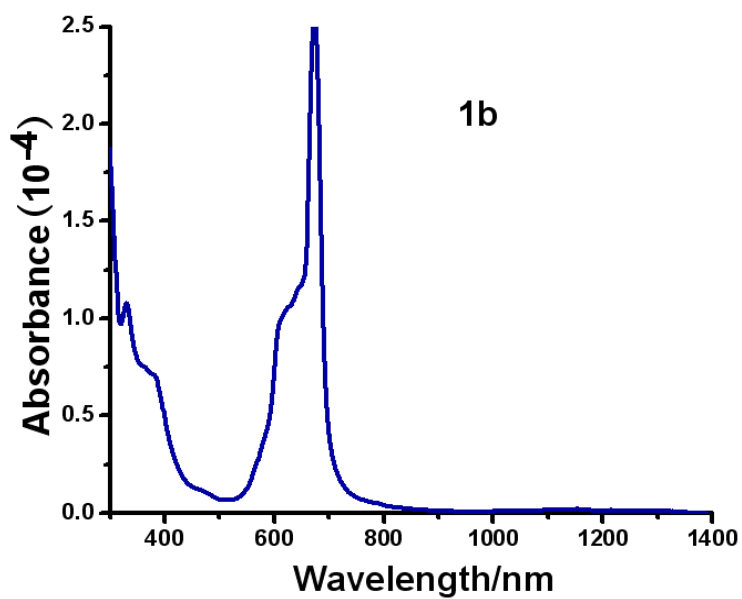

Figure S7. The XRD of 2a–3a.

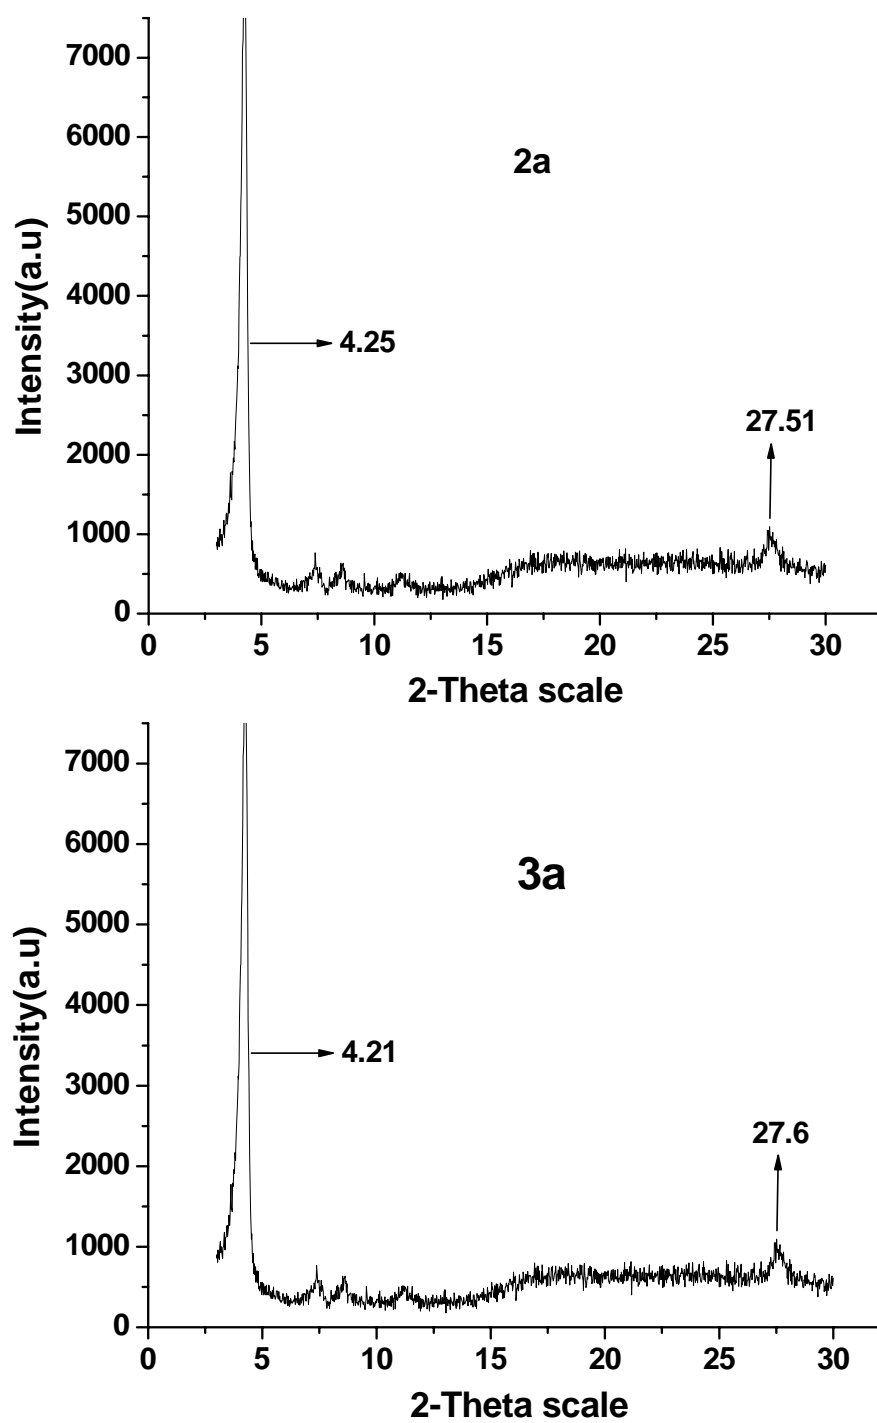

Supplement: Supplementary file 1 [file molecules-18-04628-s001.pdf]
